# Supplementary material
Source: MDPI journal article supplement (https://www.mdpi.com/2076-3417/10/10/3463)
Supplement: s1 [file s1]

Supporting Information

**Microplastic Contamination of Surface Water-Sourced Tap Water in Hong Kong – A Preliminary Study**

Theresa Wing Ling Lam<sup>a</sup>, Hiu Tung Ho<sup>a</sup>, Anson Tsz Hin Ma<sup>b</sup> & Lincoln Fok<sup>a\*</sup>

- a. Department of Science and Environmental Studies, The Education University of Hong Kong, 10 Lo Ping Road, Tai Po, Hong Kong SAR, China*
- b. Department of Geography and Resource Management, The Chinese University of Hong Kong, Shatin, Hong Kong SAR, China*

**This supporting information includes:**

Table S1: Locations of tap water sampling sites in Hong Kong.

---

\* Corresponding author. Email: [lfok@eduhk.hk](mailto:lfok@eduhk.hk)

**Table S1.** Locations of tap water sampling sites in Hong Kong.

| Sampling site |                                                      | Sampling date<br>(DD/MM/YY) |
|---------------|------------------------------------------------------|-----------------------------|
| No.           | Name                                                 |                             |
| 1             | Kam Sheung Road Women's Public Toilet                | 28/03/2018                  |
| 2             | Red Brick House Women's Public Toilet                |                             |
| 3             | Kam Tin Bor Tei Women's Public Toilet                |                             |
| 4             | Kam Tin Market Women's Public Toilet                 |                             |
| 5             | Tai Hong Wai Men's Public Toilet                     |                             |
| 6             | Tuen Mun Swimming Pool Disabled Toilet               |                             |
| 7             | Leung Tin Sport Centre Women's Toilet                |                             |
| 8             | Leung Tin Plaza Women's Toilet                       |                             |
| 9             | Tsing Tin Playground Men's Toilet                    |                             |
| 10            | Kin Sang Shopping Centre Men's Toilet                |                             |
| 11            | Fung Kam Street Sports Centre Women's Toilet         |                             |
| 12            | Yuen Long Sports Centre Men's Toilet                 |                             |
| 13            | Yuen Long Public Library Women's Toilet              |                             |
| 14            | Yuen Long Park Women's Toilet                        |                             |
| 15            | Long Ping Sports Centre Men's Toilet                 |                             |
| 16            | Long Ping Shopping Centre Women's Toilet             |                             |
| 17            | Tin Shing Shopping Centre Women's Toilet             |                             |
| 18            | Tin Yiu Plaza Men's Toilet                           |                             |
| 19            | Ping Shan Tin Shui Wai Public Library Women's Toilet |                             |
| 20            | Ping Shan Tin Shui Wai Sports Centre                 |                             |
| 21            | Tuen Mun Public Library Women's Toilet               |                             |
| 22            | Tuen Mun Town Hall Women's Toilet                    |                             |
| 23            | Tuen Mun Park Women's Toilet                         |                             |
| 24            | Children's Playground at Castle Peak Men's Toilet    |                             |
| 25            | Wu Shan Recreation Playground Men's Toilet           |                             |
| 26            | Siu Hei Commercial Centre Women's Toilet             |                             |

|    |                                                    |            |
|----|----------------------------------------------------|------------|
| 27 | Tuen Mun Recreation and Sports Centre Men's Toilet |            |
| 28 | Butterfly Plaza Women's Toilet                     |            |
| 29 | Tuen Mun Ferry Pier Men's Public Toilet            |            |
| 30 | Butterfly Beach Park Women's Toilet                |            |
| 31 | Kwai Fong Plaza Women's Toilet                     | 06/03/2018 |
| 32 | North Kwai Chung Public Library Women's Toilet     | 10/03/2018 |
| 33 | Shek Yam Shopping Centre                           | 11/03/2018 |
| 34 | Sha Tsui Road Playground                           |            |
| 35 | On Yam Shopping Centre                             |            |
| 36 | Tai Wo Hau Sports Centre Women's Toilet            | 25/03/2018 |
| 37 | Tai Wo Hau Shopping Centre Men's Toilet            |            |
| 38 | Kwok Shui Road Park Women's Toilet                 |            |
| 39 | Wai Tsuen Sports Centre Women's Toilet             |            |
| 40 | Jockey Club Tak Wah Park Women's Toilet            |            |
| 41 | Tsuen Wan West Sports Centre                       | 26/04/2018 |
| 42 | Heung Che Street Market Men's Toilet               |            |
| 43 | Chai Wan Kok Street Men's Public Toilet            |            |
| 44 | Tsuen King Circuit Playground Men's Toilet         |            |
| 45 | Tsuen Wan Park Men's Toilet                        |            |
| 46 | Tsuen Wan City Hall Men's Toilet                   |            |
| 47 | Tsuen King Circuit Sports Centre Men's Toilet      |            |
| 48 | Yeung Uk Road Market Men's Toilet                  |            |
| 49 | Tsuen Wan Public Library Men's Toilet              |            |
| 50 | Hon Man Lower Village Men's Public Toilet          |            |
| 51 | Sha Tin Public Library Women's Toilet              | 07/03/2018 |
| 52 | Sha Tin City Hall Women's Toilet                   |            |
| 53 | Ma On Shan Sports Ground Women's Toilet            |            |
| 54 | Ma On Shan Park Women's Toilet                     |            |

|    |                                               |            |
|----|-----------------------------------------------|------------|
| 55 | Yiu On Shopping Centre Women's Toilet         |            |
| 56 | On Luk Street Park Women's Public Toilet      |            |
| 57 | Ma On Shan Shopping Centre                    |            |
| 58 | Ma On Shan Public Library Women's Toilet      |            |
| 59 | Heng On Sports Centre Women's Toilet          |            |
| 60 | Heng On Shopping Centre Women's Toilet        |            |
| 61 | Shui Wo Street Public Library Women's Toilet  | 04/03/2018 |
| 62 | Tseung Kwan O Public Library Women's Toilet   |            |
| 63 | Tseung Kwan O Sports Centre Women's Toilet    |            |
| 64 | King Lam Shopping Centre Women's Toilet       |            |
| 65 | Tiu Keng Leng Sports Centre Women's Toilet    |            |
| 66 | Choi Ming Shopping Centre Women's Toilet      |            |
| 67 | Lei Yue Mun Plaza Women's Toilet              |            |
| 68 | Kai Tin Shopping Centre Women's Toilet        |            |
| 69 | Lam Tin Complex Women's Toilet                |            |
| 70 | Lam Tin South Sports Centre Women's Toilet    |            |
| 71 | Cheung Wah Shopping Centre Women's Toilet     | 11/04/2018 |
| 72 | Fanling Hong Lok Park Women's Toilet          |            |
| 73 | Fanling Recreation Ground Women's Toilet      |            |
| 74 | Luen Wo Hui Sports Centre Women's Toilet      |            |
| 75 | Fanling Public Library Women's Toilet         |            |
| 76 | Choi Yuen Plaza Women's Toilet                |            |
| 77 | Sheung Shui Public Library Women's Toilet     |            |
| 78 | Sheung Shui Garden No.1 Women's Public Toilet |            |
| 79 | Lung Sum Avenue Sports Centre Women's Toilet  |            |
| 80 | Shek Wu Hui Market Women's Toilet             |            |
| 81 | Hong Kong City Hall Disabled Toilet           | 11/03/2018 |
| 82 | City Hall Public Library Women's Toilet       |            |

|     |                                                           |            |
|-----|-----------------------------------------------------------|------------|
| 83  | Central and Western District Promenade (Central Section)  | 22/03/2018 |
| 84  | Lung Hing Public Library Women's Toilet                   |            |
| 85  | Fa Yuen Street Public Library Women's Toilet              |            |
| 86  | Boundary Street Sports Centre No.2 Women's Toilet         |            |
| 87  | To Kwa Wan Sports Centre Women's Toilet                   |            |
| 88  | Temple Mall Women's Toilet                                | 11/03/2018 |
| 89  | Lok Fu Plaza Zone A Women's Toilet                        |            |
| 90  | Morse Park (Park No.4) Women's Toilet                     |            |
| 91  | Hong Kong International Airport Terminal 2 Women's Toilet | 21/04/2018 |
| 92  | Tsing Yi Sports Ground Women's Toilet                     |            |
| 93  | Tsing Yi Public Library Women's Toilet                    |            |
| 94  | Hong Kong Disneyland City Hall Women's Toilet             |            |
| 95  | Hong Kong Disneyland Tomorrowland Women's Toilet          |            |
| 96  | Cheung Fat Plaza Women's Toilet                           |            |
| 97  | Cheung Fat Sports Centre Women's Toilet                   |            |
| 98  | Lutheran Village Women's Public Toilet                    |            |
| 99  | Tsing Yi Swimming Pool Disabled Toilet                    |            |
| 100 | Tsing Yi Pier Women's Public Toilet                       |            |
| 101 | Cheung Chau Sports Centre Men's Toilet                    | 25/03/2018 |
| 102 | Cheung Chau Market Men's Toilet                           |            |
| 103 | Round Table Third Village Men's Public Toilet             |            |
| 104 | Smithfield Sports Centre Men's Toilet                     | 13/04/2018 |
| 105 | Kennedy Town Community Complex Men's Toilet               |            |
| 106 | Sai Ying Pun Market Men's Toilet                          |            |
| 107 | Sai Woo Lane Playground Men's Toilet                      |            |
| 108 | Hospital Road Basketball Court Men's Toilet               |            |
| 109 | Li Sing Street Playground Men's Toilet                    |            |
| 110 | Sai Ying Pun Community Complex Men's Toilet               |            |
